# Supplementary material for: Thoracic surgery in the UK
Source: PubMed Central journal article supplement — J Thorac Dis. 2022 Feb;14(2):575–8. doi: 10.21037/jtd-21-1080 (PMC8902110; doi:10.21037/jtd-21-1080), 2022-02
Supplement: jtd-14-02-575-coif.pdf [file jtd-14-02-575-coif.pdf]

## ICMJE DISCLOSURE FORM

Date: 20 Sept 2021  
 Your Name: Aina Pons  
 Manuscript Title: Thoracic Surgery in the UK  
 Manuscript number (if known): \_\_\_\_\_

In the interest of transparency, we ask you to disclose all relationships/activities/interests listed below that are related to the content of your manuscript. "Related" means any relation with for-profit or not-for-profit third parties whose interests may be affected by the content of the manuscript. Disclosure represents a commitment to transparency and does not necessarily indicate a bias. If you are in doubt about whether to list a relationship/activity/interest, it is preferable that you do so.

The following questions apply to the author's relationships/activities/interests as they relate to the current manuscript only.

The author's relationships/activities/interests should be defined broadly. For example, if your manuscript pertains to the epidemiology of hypertension, you should declare all relationships with manufacturers of antihypertensive medication, even if that medication is not mentioned in the manuscript.

In item #1 below, report all support for the work reported in this manuscript without time limit. For all other items, the time frame for disclosure is the past 36 months.

|                                                           |                                                                                                                                                                                | Name all entities with whom you have this relationship or indicate none (add rows as needed) | Specifications/Comments (e.g., if payments were made to you or to your institution) |
|-----------------------------------------------------------|--------------------------------------------------------------------------------------------------------------------------------------------------------------------------------|----------------------------------------------------------------------------------------------|-------------------------------------------------------------------------------------|
| <b>Time frame: Since the initial planning of the work</b> |                                                                                                                                                                                |                                                                                              |                                                                                     |
| 1                                                         | All support for the present manuscript (e.g., funding, provision of study materials, medical writing, article processing charges, etc.)<br><b>No time limit for this item.</b> | <input checked="" type="checkbox"/> None                                                     |                                                                                     |
|                                                           |                                                                                                                                                                                |                                                                                              |                                                                                     |
|                                                           |                                                                                                                                                                                |                                                                                              |                                                                                     |
|                                                           |                                                                                                                                                                                |                                                                                              |                                                                                     |
|                                                           |                                                                                                                                                                                |                                                                                              |                                                                                     |
|                                                           |                                                                                                                                                                                |                                                                                              |                                                                                     |
| <b>Time frame: past 36 months</b>                         |                                                                                                                                                                                |                                                                                              |                                                                                     |
| 2                                                         | Grants or contracts from any entity (if not indicated in item #1 above).                                                                                                       | <input checked="" type="checkbox"/> None                                                     |                                                                                     |
|                                                           |                                                                                                                                                                                |                                                                                              |                                                                                     |
| 3                                                         | Royalties or licenses                                                                                                                                                          | <input checked="" type="checkbox"/> None                                                     |                                                                                     |
|                                                           |                                                                                                                                                                                |                                                                                              |                                                                                     |
| 4                                                         | Consulting fees                                                                                                                                                                | <input checked="" type="checkbox"/> None                                                     |                                                                                     |
|                                                           |                                                                                                                                                                                |                                                                                              |                                                                                     |

|    |                                                                                                              |                                          |  |
|----|--------------------------------------------------------------------------------------------------------------|------------------------------------------|--|
| 5  | Payment or honoraria for lectures, presentations, speakers bureaus, manuscript writing or educational events | <input checked="" type="checkbox"/> None |  |
| 6  | Payment for expert testimony                                                                                 | <input checked="" type="checkbox"/> None |  |
| 7  | Support for attending meetings and/or travel                                                                 | <input checked="" type="checkbox"/> None |  |
| 8  | Patents planned, issued or pending                                                                           | <input checked="" type="checkbox"/> None |  |
| 9  | Participation on a Data Safety Monitoring Board or Advisory Board                                            | <input checked="" type="checkbox"/> None |  |
| 10 | Leadership or fiduciary role in other board, society, committee or advocacy group, paid or unpaid            | <input checked="" type="checkbox"/> None |  |
| 11 | Stock or stock options                                                                                       | <input checked="" type="checkbox"/> None |  |
| 12 | Receipt of equipment, materials, drugs, medical writing, gifts or other services                             | <input checked="" type="checkbox"/> None |  |
| 13 | Other financial or non-financial interests                                                                   | <input checked="" type="checkbox"/> None |  |

**Please summarize the above conflict of interest in the following box:**

None

**Please place an "X" next to the following statement to indicate your agreement:**

I certify that I have answered every question and have not altered the wording of any of the questions on this form.

## ICMJE DISCLOSURE FORM

**Date:** 9/14/2021

**Your Name:** Eric Lim

**Manuscript Title:** Thoracic Surgery in the UK

**Manuscript Number (if known):** JTD-21-1080

In the interest of transparency, we ask you to disclose all relationships/activities/interests listed below that are related to the content of your manuscript. "Related" means any relation with for-profit or not-for-profit third parties whose interests may be affected by the content of the manuscript. Disclosure represents a commitment to transparency and does not necessarily indicate a bias. If you are in doubt about whether to list a relationship/activity/interest, it is preferable that you do so.

In the interest of transparency, we ask you to disclose all relationships/activities/interests listed below that are related to the content of your manuscript. "Related" means any relation with for-profit or not-for-profit third parties whose interests may be affected by the content of the manuscript. Disclosure represents a commitment to transparency and does not necessarily indicate a bias. If you are in doubt about whether to list a relationship/activity/interest, it is preferable that you do so.

The author's relationships/activities/interests should be defined broadly. For example, if your manuscript pertains to the epidemiology of hypertension, you should declare all relationships with manufacturers of antihypertensive medication, even if that medication is not mentioned in the manuscript.

In item #1 below, report all support for the work reported in this manuscript without time limit. For all other items, the time frame for disclosure is the past 36 months.

|                                                    | Name all entities with whom you have this relationship or indicate none (add rows as needed)                                                                                   | Specifications/Comments (e.g., if payments were made to you or to your institution)                                                                                                                                                                                                                                                                      |                               |    |                      |    |                 |                     |       |    |
|----------------------------------------------------|--------------------------------------------------------------------------------------------------------------------------------------------------------------------------------|----------------------------------------------------------------------------------------------------------------------------------------------------------------------------------------------------------------------------------------------------------------------------------------------------------------------------------------------------------|-------------------------------|----|----------------------|----|-----------------|---------------------|-------|----|
| Time frame: Since the initial planning of the work |                                                                                                                                                                                |                                                                                                                                                                                                                                                                                                                                                          |                               |    |                      |    |                 |                     |       |    |
| <b>1</b>                                           | All support for the present manuscript (e.g., funding, provision of study materials, medical writing, article processing charges, etc.)<br><b>No time limit for this item.</b> | <input type="checkbox"/> <b>None</b><br><table border="1" style="width: 100%; border-collapse: collapse; margin-top: 10px;"> <tr> <td style="width: 60%;">Johnson and Johnson / Ethicon</td> <td>Me</td> </tr> <tr> <td>Covidien / Medtronic</td> <td>Me</td> </tr> <tr> <td>Guardant Health</td> <td>My institution</td> </tr> </table>                 | Johnson and Johnson / Ethicon | Me | Covidien / Medtronic | Me | Guardant Health | My institution      |       |    |
| Johnson and Johnson / Ethicon                      | Me                                                                                                                                                                             |                                                                                                                                                                                                                                                                                                                                                          |                               |    |                      |    |                 |                     |       |    |
| Covidien / Medtronic                               | Me                                                                                                                                                                             |                                                                                                                                                                                                                                                                                                                                                          |                               |    |                      |    |                 |                     |       |    |
| Guardant Health                                    | My institution                                                                                                                                                                 |                                                                                                                                                                                                                                                                                                                                                          |                               |    |                      |    |                 |                     |       |    |
| Time frame: past 36 months                         |                                                                                                                                                                                |                                                                                                                                                                                                                                                                                                                                                          |                               |    |                      |    |                 |                     |       |    |
| <b>2</b>                                           | Grants or contracts from any entity (if not indicated in item #1 above).                                                                                                       | <input type="checkbox"/> <b>None</b><br><table border="1" style="width: 100%; border-collapse: collapse; margin-top: 10px;"> <tr> <td style="width: 60%;">AstraZeneca</td> <td>Me</td> </tr> <tr> <td>Boehringer Ingelheim</td> <td>Me</td> </tr> <tr> <td>Medela</td> <td>Me / my institution</td> </tr> <tr> <td>Lilly</td> <td>Me</td> </tr> </table> | AstraZeneca                   | Me | Boehringer Ingelheim | Me | Medela          | Me / my institution | Lilly | Me |
| AstraZeneca                                        | Me                                                                                                                                                                             |                                                                                                                                                                                                                                                                                                                                                          |                               |    |                      |    |                 |                     |       |    |
| Boehringer Ingelheim                               | Me                                                                                                                                                                             |                                                                                                                                                                                                                                                                                                                                                          |                               |    |                      |    |                 |                     |       |    |
| Medela                                             | Me / my institution                                                                                                                                                            |                                                                                                                                                                                                                                                                                                                                                          |                               |    |                      |    |                 |                     |       |    |
| Lilly                                              | Me                                                                                                                                                                             |                                                                                                                                                                                                                                                                                                                                                          |                               |    |                      |    |                 |                     |       |    |

|          |                                                                                                              | Name all entities with whom you have this relationship or indicate none (add rows as needed)                                                                                                                                                                                                                                  | Specifications/Comments (e.g., if payments were made to you or to your institution) |                      |          |                      |     |    |  |  |  |
|----------|--------------------------------------------------------------------------------------------------------------|-------------------------------------------------------------------------------------------------------------------------------------------------------------------------------------------------------------------------------------------------------------------------------------------------------------------------------|-------------------------------------------------------------------------------------|----------------------|----------|----------------------|-----|----|--|--|--|
| 3        | Royalties or licenses                                                                                        | <input checked="" type="checkbox"/> <b>None</b><br><table border="1" style="width: 100%; border-collapse: collapse;"> <tr><td style="width: 50%; height: 20px;"></td><td style="width: 50%;"></td></tr> <tr><td style="height: 20px;"></td><td></td></tr> <tr><td style="height: 20px;"></td><td></td></tr> </table>          |                                                                                     |                      |          |                      |     |    |  |  |  |
|          |                                                                                                              |                                                                                                                                                                                                                                                                                                                               |                                                                                     |                      |          |                      |     |    |  |  |  |
|          |                                                                                                              |                                                                                                                                                                                                                                                                                                                               |                                                                                     |                      |          |                      |     |    |  |  |  |
|          |                                                                                                              |                                                                                                                                                                                                                                                                                                                               |                                                                                     |                      |          |                      |     |    |  |  |  |
| 4        | Consulting fees                                                                                              | <input type="checkbox"/> <b>None</b><br><table border="1" style="width: 100%; border-collapse: collapse;"> <tr><td style="width: 50%;">Beigene</td><td style="width: 50%;">Me</td></tr> <tr><td>Roche</td><td>Me</td></tr> <tr><td>BMS</td><td>Me</td></tr> <tr><td style="height: 20px;"></td><td></td></tr> </table>        | Beigene                                                                             | Me                   | Roche    | Me                   | BMS | Me |  |  |  |
| Beigene  | Me                                                                                                           |                                                                                                                                                                                                                                                                                                                               |                                                                                     |                      |          |                      |     |    |  |  |  |
| Roche    | Me                                                                                                           |                                                                                                                                                                                                                                                                                                                               |                                                                                     |                      |          |                      |     |    |  |  |  |
| BMS      | Me                                                                                                           |                                                                                                                                                                                                                                                                                                                               |                                                                                     |                      |          |                      |     |    |  |  |  |
|          |                                                                                                              |                                                                                                                                                                                                                                                                                                                               |                                                                                     |                      |          |                      |     |    |  |  |  |
| 5        | Payment or honoraria for lectures, presentations, speakers bureaus, manuscript writing or educational events | <input type="checkbox"/> <b>None</b><br><table border="1" style="width: 100%; border-collapse: collapse;"> <tr><td style="width: 50%;">Medela</td><td style="width: 50%;">Me</td></tr> <tr><td style="height: 20px;"></td><td></td></tr> <tr><td style="height: 20px;"></td><td></td></tr> </table>                           | Medela                                                                              | Me                   |          |                      |     |    |  |  |  |
| Medela   | Me                                                                                                           |                                                                                                                                                                                                                                                                                                                               |                                                                                     |                      |          |                      |     |    |  |  |  |
|          |                                                                                                              |                                                                                                                                                                                                                                                                                                                               |                                                                                     |                      |          |                      |     |    |  |  |  |
|          |                                                                                                              |                                                                                                                                                                                                                                                                                                                               |                                                                                     |                      |          |                      |     |    |  |  |  |
| 6        | Payment for expert testimony                                                                                 | <input checked="" type="checkbox"/> <b>None</b><br><table border="1" style="width: 100%; border-collapse: collapse;"> <tr><td style="width: 50%; height: 20px;"></td><td style="width: 50%;"></td></tr> <tr><td style="height: 20px;"></td><td></td></tr> <tr><td style="height: 20px;"></td><td></td></tr> </table>          |                                                                                     |                      |          |                      |     |    |  |  |  |
|          |                                                                                                              |                                                                                                                                                                                                                                                                                                                               |                                                                                     |                      |          |                      |     |    |  |  |  |
|          |                                                                                                              |                                                                                                                                                                                                                                                                                                                               |                                                                                     |                      |          |                      |     |    |  |  |  |
|          |                                                                                                              |                                                                                                                                                                                                                                                                                                                               |                                                                                     |                      |          |                      |     |    |  |  |  |
| 7        | Support for attending meetings and/or travel                                                                 | <input checked="" type="checkbox"/> <b>None</b><br><table border="1" style="width: 100%; border-collapse: collapse;"> <tr><td style="width: 50%; height: 20px;"></td><td style="width: 50%;"></td></tr> <tr><td style="height: 20px;"></td><td></td></tr> <tr><td style="height: 20px;"></td><td></td></tr> </table>          |                                                                                     |                      |          |                      |     |    |  |  |  |
|          |                                                                                                              |                                                                                                                                                                                                                                                                                                                               |                                                                                     |                      |          |                      |     |    |  |  |  |
|          |                                                                                                              |                                                                                                                                                                                                                                                                                                                               |                                                                                     |                      |          |                      |     |    |  |  |  |
|          |                                                                                                              |                                                                                                                                                                                                                                                                                                                               |                                                                                     |                      |          |                      |     |    |  |  |  |
| 8        | Patents planned, issued or pending                                                                           | <input type="checkbox"/> <b>None</b><br><table border="1" style="width: 100%; border-collapse: collapse;"> <tr><td style="width: 50%;">P52435GB</td><td style="width: 50%;">Imperial Innovations</td></tr> <tr><td>P57988GB</td><td>Imperial Innovations</td></tr> <tr><td style="height: 20px;"></td><td></td></tr> </table> | P52435GB                                                                            | Imperial Innovations | P57988GB | Imperial Innovations |     |    |  |  |  |
| P52435GB | Imperial Innovations                                                                                         |                                                                                                                                                                                                                                                                                                                               |                                                                                     |                      |          |                      |     |    |  |  |  |
| P57988GB | Imperial Innovations                                                                                         |                                                                                                                                                                                                                                                                                                                               |                                                                                     |                      |          |                      |     |    |  |  |  |
|          |                                                                                                              |                                                                                                                                                                                                                                                                                                                               |                                                                                     |                      |          |                      |     |    |  |  |  |
| 9        | Participation on a Data Safety Monitoring Board or Advisory Board                                            | <input checked="" type="checkbox"/> <b>None</b><br><table border="1" style="width: 100%; border-collapse: collapse;"> <tr><td style="width: 50%; height: 20px;"></td><td style="width: 50%;"></td></tr> <tr><td style="height: 20px;"></td><td></td></tr> <tr><td style="height: 20px;"></td><td></td></tr> </table>          |                                                                                     |                      |          |                      |     |    |  |  |  |
|          |                                                                                                              |                                                                                                                                                                                                                                                                                                                               |                                                                                     |                      |          |                      |     |    |  |  |  |
|          |                                                                                                              |                                                                                                                                                                                                                                                                                                                               |                                                                                     |                      |          |                      |     |    |  |  |  |
|          |                                                                                                              |                                                                                                                                                                                                                                                                                                                               |                                                                                     |                      |          |                      |     |    |  |  |  |
| 10       | Leadership or fiduciary role in other board,                                                                 | <input checked="" type="checkbox"/> <b>None</b><br><table border="1" style="width: 100%; border-collapse: collapse;"> <tr><td style="width: 50%; height: 20px;"></td><td style="width: 50%;"></td></tr> </table>                                                                                                              |                                                                                     |                      |          |                      |     |    |  |  |  |
|          |                                                                                                              |                                                                                                                                                                                                                                                                                                                               |                                                                                     |                      |          |                      |     |    |  |  |  |

|           |                                                                                  | Name all entities with whom you have this relationship or indicate none (add rows as needed) | Specifications/Comments (e.g., if payments were made to you or to your institution) |
|-----------|----------------------------------------------------------------------------------|----------------------------------------------------------------------------------------------|-------------------------------------------------------------------------------------|
|           | society, committee or advocacy group, paid or unpaid                             |                                                                                              |                                                                                     |
| <b>11</b> | Stock or stock options                                                           | <input checked="" type="checkbox"/> <b>None</b>                                              |                                                                                     |
|           |                                                                                  |                                                                                              |                                                                                     |
| <b>12</b> | Receipt of equipment, materials, drugs, medical writing, gifts or other services | <input checked="" type="checkbox"/> <b>None</b>                                              |                                                                                     |
|           |                                                                                  |                                                                                              |                                                                                     |
| <b>13</b> | Other financial or non-financial interests                                       | <input type="checkbox"/> <b>None</b>                                                         |                                                                                     |
|           |                                                                                  | VIOLET NIHR HTA (13/04/03)                                                                   | Chief investigator                                                                  |
|           |                                                                                  | MARS 2 NIHR HTA (15/188/31)                                                                  | Chief investigator                                                                  |
|           |                                                                                  | RAMON NIHR HTA (131306)                                                                      | Chief investigator                                                                  |
|           |                                                                                  | My Cancer Companion, Healthcare Companion Ltd                                                | Founder                                                                             |

Please summarize the above conflict of interest in the following box:

Outside this work, Prof. Lim reports personal fees from Abbott Molecular, personal fees from Glaxo Smith Kline, personal fees from Pfizer, personal fees from Norvatis, personal fees from Medtronic / Covidien, personal fees from Roche, personal fees from Lily Oncology, grants and personal fees from Boehringer Ingelheim, grants and personal fees from Medela, grants and personal fees from ScreenCell, personal fees from Johnson and Johnson / Ethicon, grants from Clearbridge Biomedics, grants from Illumina, grants from Guardant Health, grants and personal fees from AstraZeneca, personal fees from BMS, outside the submitted work; In addition, Dr. Lim has a patent P52435GB issued to Imperial Innovations, and a patent P57988GB issued to Imperial Innovations and CI for VIOLET NIHR HTA (13/04/03), CI for MARS 2 NIHR HTA (15/188/31), CI for RAMON NIHR HTA (131306). Founder of My Cancer Companion and Healthcare Companion Ltd. <sup>47</sup>

Please place an "X" next to the following statement to indicate your agreement:

I certify that I have answered every question and have not altered the wording of any of the questions on this form.
